# Supplementary material for: Capacity for instantaneous catabolism of preferred and non-preferred carbon sources in Escherichia coli and Bacillus subtilis
Source: PubMed Central journal article supplement (PMC6079084; doi:10.1038/s41598-018-30266-3), 2018-08-06
Supplement: 41598_2018_30266_MOESM1_ESM.pdf [file 41598_2018_30266_MOESM1_ESM.pdf]

# Capacity for instantaneous catabolism of preferred and non-preferred carbon sources in *Escherichia coli* and *Bacillus subtilis*

Marieke F. Buffing<sup>1,2</sup>, Hannes Link<sup>3</sup>, Dimitris Christodoulou<sup>1,2</sup>, and Uwe Sauer<sup>1,\*</sup>

<sup>1</sup> Institute of Molecular Systems Biology, ETH Zurich, Zurich, Switzerland

<sup>2</sup> Life Science Zurich PhD Program on Systems Biology, Zurich, Switzerland

<sup>3</sup> Max Planck Institute for Terrestrial Microbiology, Marburg, Germany

\* Corresponding author. Tel: +41 44 633 36 72; E-mail: [sauer@imsb.biol.ethz.ch](mailto:sauer@imsb.biol.ethz.ch)

## Supplementary information

### Supplement – table S1

Table S1 – Growth rate and carbon source uptake rates. C = concentration,  $\mu$  = growth rate,  $q_s$  = uptake rate.

| Carbon source                            | $\mu$<br>h <sup>-1</sup> | Substrate | C<br>g L <sup>-1</sup> | $q_s$<br>mmol h <sup>-1</sup> gcdw <sup>-1</sup> | Reference |
|------------------------------------------|--------------------------|-----------|------------------------|--------------------------------------------------|-----------|
| <b><i>Bacillus subtilis</i> 168 trp+</b> |                          |           |                        |                                                  |           |
| glucose                                  | 0.59 ± 0.02              | glucose   | 3                      | 7.63 ± 0.11                                      | 19        |
| pyruvate                                 | 0.17 ± 0.01              | pyruvate  | 5                      | 8.26 ± 0.23                                      | 19        |
| malate                                   | 0.57 ± 0.05              | malate    | 5                      | 26.51 ± 2.01                                     | 19        |
| glucose and malate                       | 0.75 ± 0.01              | glucose   | 2                      | 5.95 ± 1.10                                      | 19        |
|                                          |                          | malate    | 4                      | 14.60 ± 1.56                                     | 19        |
| <b><i>Escherichia coli</i> BW 25113</b>  |                          |           |                        |                                                  |           |
| glucose                                  | 0.65 ± 0.01              | glucose   | 3                      | 9.65 ± 0.04                                      | 6         |
| pyruvate                                 | 0.39 ± 0.01              | pyruvate  | 5                      | 26.71 ± 0.79                                     | 6         |

## Supplement – model description

### Irreversible reactions

Reaction 1 – glucose specific phosphotransferase system (PTSg)

$$v_{PTSg} = v_{max,PTSg} \frac{C_{glucose}}{C_{glucose} + K_{PTSg,glucose}}$$

Reaction 2 – 6-phosphofructokinase (Pfk)

$$v_{Pfk} = v_{max,Pfk} \frac{C_{F6P}}{C_{F6P} + K_{Pfk,F6P}}$$

Reaction 3 – fructose-1,6-biphosphatase (Fbp)

$$v_{Fbp} = v_{max,Fbp} \frac{C_{FBP}}{C_{FBP} + K_{Fbp,FBP}}$$

Reaction 4 – glucose 6-phosphate dehydrogenase (G6PDH)

$$v_{G6PDH} = v_{max,G6PDH} \frac{C_{G6P}}{C_{G6P} + K_{G6PDH,G6P}}$$

Reaction 5 – phosphoenolpyruvate carboxykinase (Pck)

$$v_{Pck} = v_{max,Pck} \frac{C_{OAA}}{C_{OAA} + K_{Pck,OAA}}$$

Reaction 6 – pyruvate kinase (Pyk)

$$v_{Pyk} = v_{max,Pyk} \frac{C_{PEP}}{C_{PEP} + K_{Pyk,PEP}}$$

Reaction 7 – pyruvate carboxylase (Pyc)

$$v_{Pyc} = v_{max,Pyc} \frac{C_{PYR}}{C_{PYR} + K_{Pyc,PYR}}$$

Reaction 8 – pyruvate uptake

$$v_{PYRup} = v_{max,PYRup} \text{ if } C_{PYR,extern} \neq 0$$

$$v_{PYRup} = 0 \text{ if } C_{PYR,extern} = 0$$

Reaction 9 – pyruvate dehydrogenase (Pdh)

$$v_{Pdh} = v_{max,Pdh} \frac{C_{PYR}}{C_{PYR} + K_{Pdh,PYR}}$$

Reaction 10 – glyceraldehyde-3-phosphate dehydrogenase A (GapA)

$$v_{GapA} = v_{max,GapA} \frac{C_{DHAP}}{C_{DHAP} + K_{GapA,DHAP}}$$

Reaction 11 – glyceraldehyde-3-phosphate dehydrogenase B (GapB)

$$v_{GapB} = v_{max,GapB} \frac{C_{xPG}}{C_{xPG} + K_{GapB,xPG}}$$

## Reversible reactions

Reaction 12/13 – glucose 6-phosphate isomerase (Pgi)

$$v_{Pgi}^+ = k_{Pgi}^+ \times c_{G6P}$$

$$v_{Pgi}^- = k_{Pgi}^- \times c_{F6P}$$

Reaction 14/15 – fructose-1,6-biphosphate aldolase (Ald)

GAP and DHAP are assumed to be in equilibrium by triose phosphate isomerase

$$v_{Ald}^+ = k_{Ald}^+ \times c_{FBP}$$

$$v_{Ald}^- = k_{Ald}^- \times c_{DHAP} \times c_{DHAP}$$

Reaction 16/17 – enolase (Eno)

$$v_{Eno}^+ = k_{Eno}^+ \times c_{xPG}$$

$$v_{Eno}^- = k_{Eno}^- \times c_{PEP}$$

## Allosteric interactions

$$v_{max,i}^* = v_{max,i} \times \prod_j \left( \frac{c_j}{c_{j,0}} \right)^{a_{i,j}}$$

In which  $v$  = kinetic rate,  $c$  = concentration,  $a$  = allosteric interaction,  $i$  = enzyme catalyzing reaction,  $j$  = effector metabolite. In the base model all values for  $a$  are set to zero, making the power law equal to one.

## Parameterization

Futile cycling between Pfk and Fbpase

$$\frac{v_{Fpb} - v_{Pfk}}{v_{Fbp}} = 0.5 - 1$$

Futile cycling between GapA and GapB

$$\frac{v_{GapB} - v_{GapA}}{v_{GapB}} = 0 - 1$$

Pyk flux

$$F_{Pyk} = (0 - 0.2) \times F_{PYRup}$$

Pdh flux

$$F_{Pdh} = (0.7 - 0.75) \times F_{PYRup}$$

Pyc flux

$$F_{Pyc} = F_{PYRup} + F_{Pyk} - F_{Pdh}$$

## Model ranking

Sum of squared errors

$$SSE = \sum_m^6 \sum_n^6 (\tilde{c}_{m,n}^* - \tilde{c}_{m,n})^2$$

With  $m = 6$  metabolite concentrations,  $n = 6$  time points,  $\tilde{c}_{m,n}^*$  = simulated relative metabolite concentrations,  $\tilde{c}_{m,n}$  = measured relative metabolite concentrations.

Akaike information criterion

$$AIC = N \log\left(\frac{SSE}{N}\right) + 2K$$

$$\Delta AIC_{pairwise\ model} = AIC_{base\ model} - AIC_{pairwise\ model}$$

With  $N$  = total number of residuals, and  $K$  = number of parameters.

The final ranking of an interaction was the sum of the  $\Delta AIC$  and the frequency with which the interaction improved a model compared with respect to the base model.
